# Supplementary material
Source: PubMed Central journal article supplement (PMC4810788)

# Supplementary Figure 1

Figure 1b

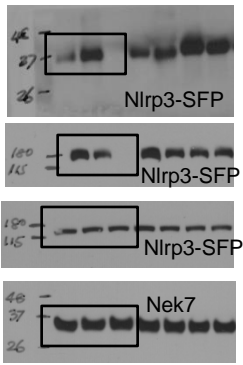

Figure 1c

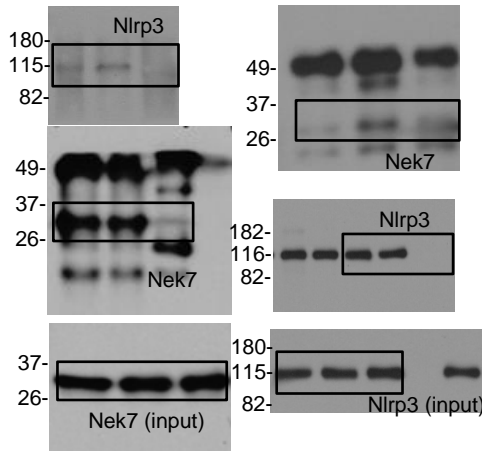

Figure 1d

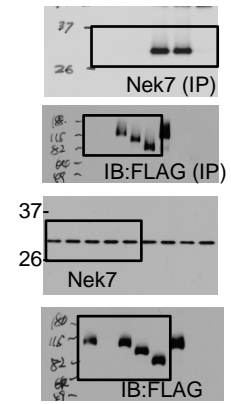

Figure 1e

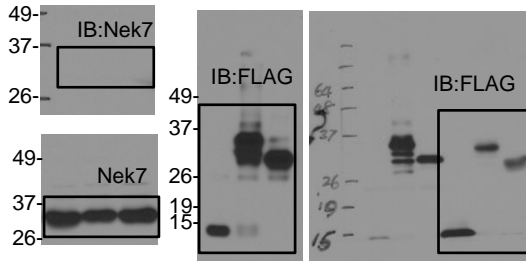

Figure 1f

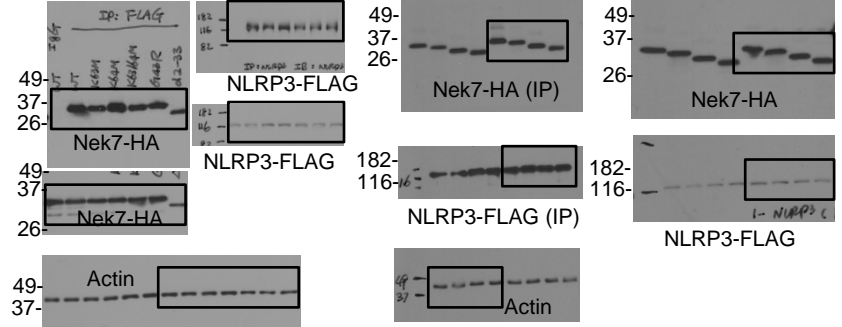

Figure 2a

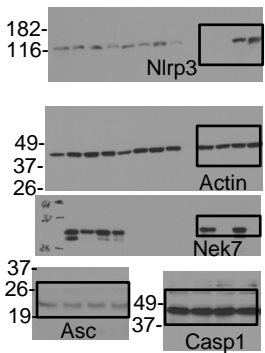

Figure 2b

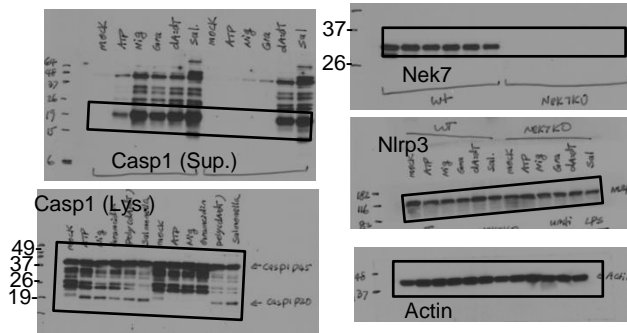

Figure 2d

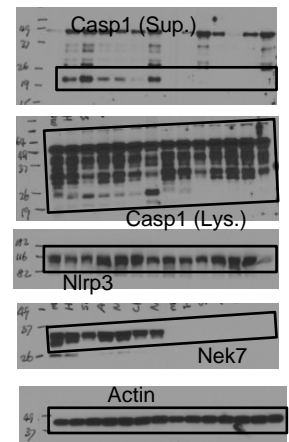

Figure 2f

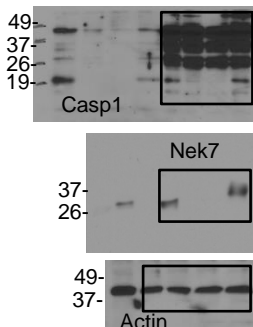

Figure 2h

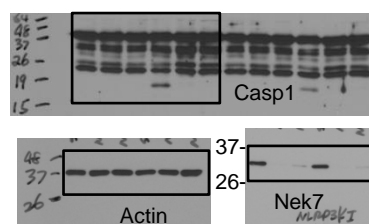

# Supplementary Figure 2

## Figure 3c

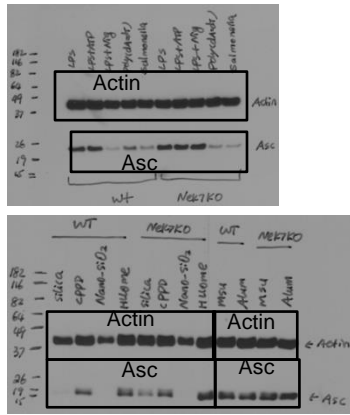

## Figure 3d

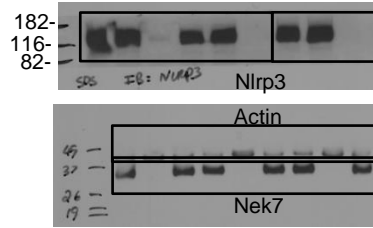

## Figure 3f

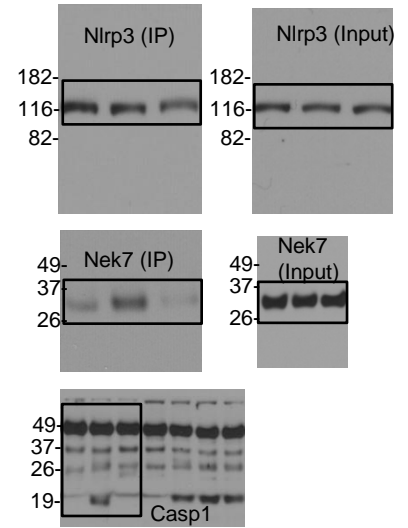

## Figure 3e

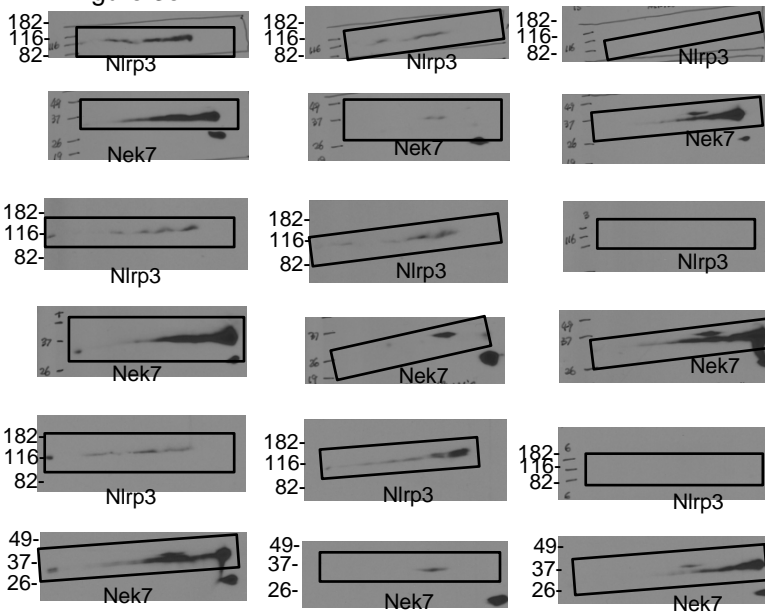

## Figure 3g

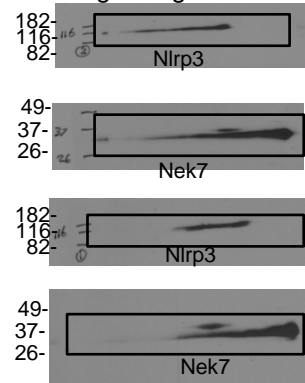

## Ext Data Fig 1a

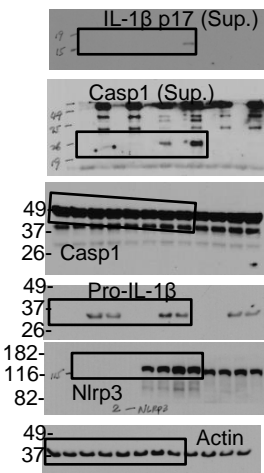

## Ext Data Fig 1b

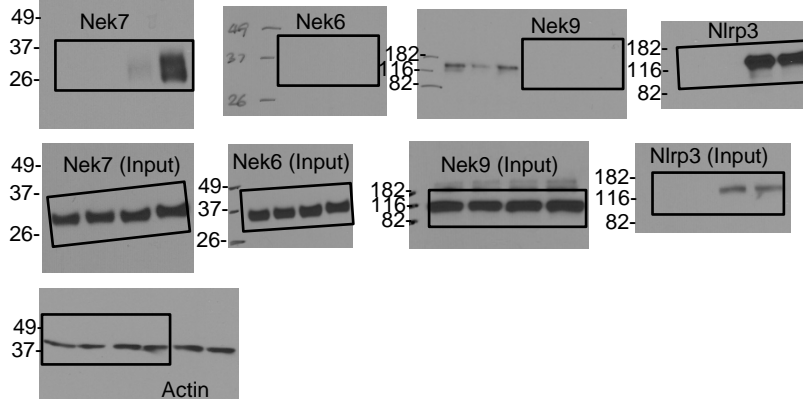

# Supplementary Figure 3

Ext Data Fig 1c

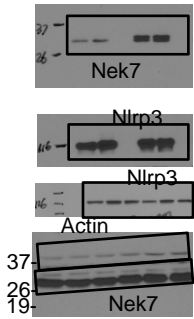

Ext Data Fig 1d

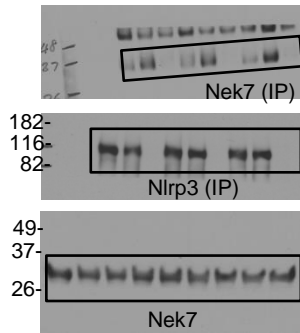

Ext Data Fig 2c

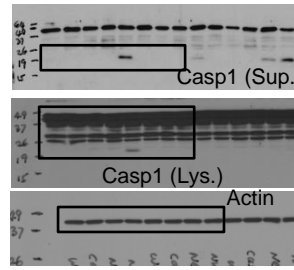

Ext Data Fig 3a

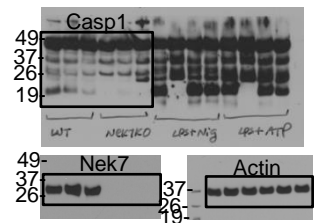

Ext Data Fig 4a

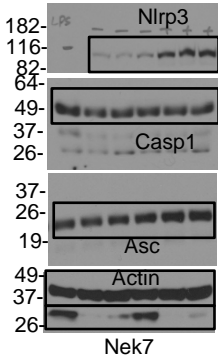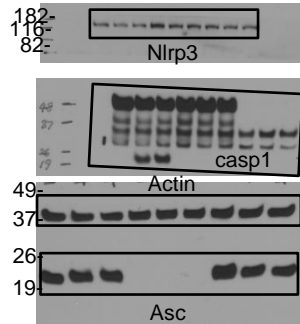

Ext Data Fig 4b

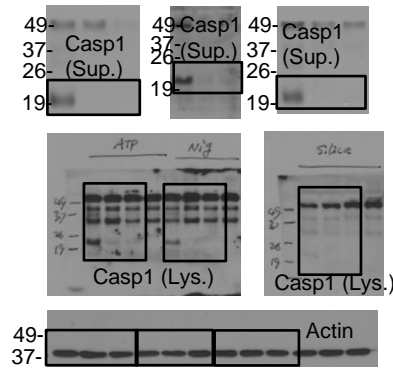

Ext Data Fig 5c

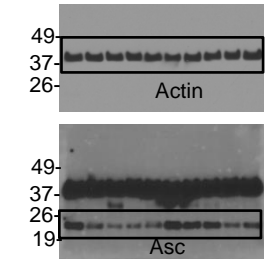

Ext Data Fig 6a

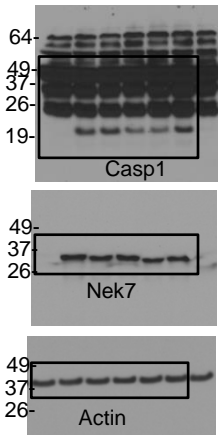

Ext Data Fig 7a

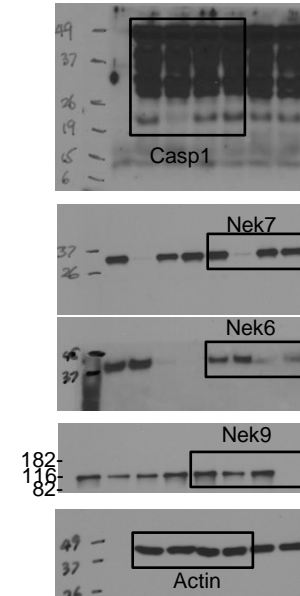

Ext Data Fig 8a

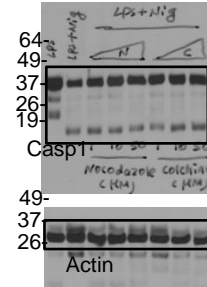

Ext Data Fig 8f

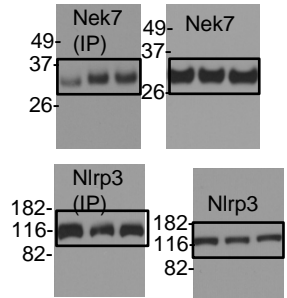

Ext Data Fig 9a

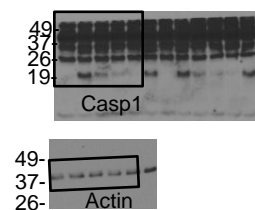

Ext Data Fig 9b

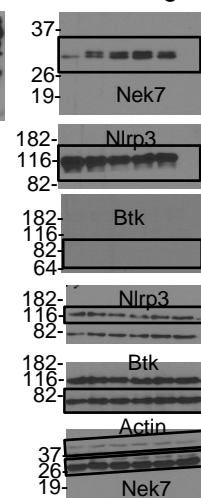

Supplement: NIHMS749629-supplement-1.pdf [file NIHMS749629-supplement-1.pdf]
